# Supplementary material for: Reliability and validity of the Japanese version of the Community Integration Measure for community-dwelling people with schizophrenia
Source: Springer Nature journal article supplement (doi:10.1186/s13033-017-0138-2), 2017-04-16
Supplement: MOESM1 [file 12224218]

Appendix 1

The Japanese version of the Community Integration Measure

(日本語版 Community Integration Measure)

|                                                               |          |         |           |          |           |
|---------------------------------------------------------------|----------|---------|-----------|----------|-----------|
| 以下について「いつもそうである」から「いつもそうではない」の中で、<br>もっともあてはまるもの1つに○をつけてください。 |          |         |           |          |           |
| 1) 私は、この地域の一員であると感じる                                          | いつもそうである | 時々そうである | どちらともいえない | 時々そうではない | いつもそうではない |
| 2) 私は、この地域をよくわかっている                                           | いつもそうである | 時々そうである | どちらともいえない | 時々そうではない | いつもそうではない |
| 3) 私は、住んでいるところの生活ルールを守りながら暮らしている                              | いつもそうである | 時々そうである | どちらともいえない | 時々そうではない | いつもそうではない |
| 4) 私は、この地域の人たちに受け入れられているように感じる                                | いつもそうである | 時々そうである | どちらともいえない | 時々そうではない | いつもそうではない |
| 5) 私は、この地域で自立した生活ができる                                         | いつもそうである | 時々そうである | どちらともいえない | 時々そうではない | いつもそうではない |
| 6) 私は、今、住んでいるところが気に入っている                                      | いつもそうである | 時々そうである | どちらともいえない | 時々そうではない | いつもそうではない |
| 7) この地域には、私にとって親しい人がいる                                        | いつもそうである | 時々そうである | どちらともいえない | 時々そうではない | いつもそうではない |
| 8) この地域の人たちと私は、よくあいさつを交わす                                     | いつもそうである | 時々そうである | どちらともいえない | 時々そうではない | いつもそうではない |
| 9) 私には、この地域で楽しんでしていることがある                                     | いつもそうである | 時々そうである | どちらともいえない | 時々そうではない | いつもそうではない |
| 10) 私は、この地域で充実した日課を送っている                                      | いつもそうである | 時々そうである | どちらともいえない | 時々そうではない | いつもそうではない |

点数化

5点、いつもそうである;4点、時々そうである;3点、どちらともいえない;2点、時々そうではない;

1点、いつもそうではない

合計 10-50点
