# Supplementary material for: Reliability and validity of the Japanese version of the Community Integration Measure for community-dwelling people with schizophrenia
Source: Springer Nature journal article supplement (doi:10.1186/s13033-017-0138-2), 2017-04-16
Supplement: MOESM2 [file 12224218]

## Appendix2

**Table 4**

CIM score difference between demographic characteristics and social isolation (n = 263)

|                              |                       | Japanese ver. |       | p-value |     |
|------------------------------|-----------------------|---------------|-------|---------|-----|
|                              |                       | CIM           |       |         |     |
|                              |                       | Mean ± SD     |       |         |     |
| Sex                          | Male                  | 35.9          | ± 8.0 | ns      |     |
|                              | Female                | 35.0          | ± 7.1 |         |     |
| Household membership         | Family member         | 35.6          | ± 7.1 | ns      |     |
|                              | Live-alone            | 35.6          | ± 8.2 |         |     |
| Marital status               | Married               | 35.4          | ± 7.8 | 0.097   | †   |
|                              | Not married           | 38.9          | ± 5.7 |         |     |
| Employment status            | Working               | 37.7          | ± 7.1 | 0.030   | *   |
|                              | Not working           | 34.7          | ± 7.8 |         |     |
| Budget                       | Sufficient            | 39.0          | ± 8.4 | 0.013   | *   |
|                              | Slightly sufficient   | 35.7          | ± 7.6 |         |     |
|                              | Slightly insufficient | 35.6          | ± 6.8 |         |     |
| Social isolation<br>(LSNS-6) | Socially isolated     | 33.3          | ± 8.0 | 0.001   | *** |
|                              | Not socially isolated | 38.6          | ± 6.1 |         |     |

Student's t-test, Analysis of variance, Tukey's test

\*\*\* p < 0.001, \* p < 0.05, † p < 0.1
